# Supplementary material for: Significantly increased energy density and discharge efficiency at high temperature in polyetherimide nanocomposites by a small amount of Al2O3 nanoparticles
Source: Royal Society of Chemistry journal article supplement (doi:10.1039/d0ta08908g), 2020-01-01
Supplement: d0ta08908g1.pdf [file d0ta08908g1.pdf]

## Supplementary information

### Significantly increased energy density and discharge efficiency at high temperature in polyetherimide nanocomposite by a small amount of Al<sub>2</sub>O<sub>3</sub> nanoparticles

Mingzhi Fan, Penghao Hu\*, Zhenkang Dan, Jianyong Jiang, Binzhou Sun, Yang Shen\*

Corresponding author

E-mail: [huph@ustb.edu.cn](mailto:huph@ustb.edu.cn); [shyang\\_mse@tsinghua.edu.cn](mailto:shyang_mse@tsinghua.edu.cn)

**Fig. S1(a)** presents the X-ray diffraction (XRD) patterns of the AO-nps, and all of the deflection peaks of the product are well indexed by the standard data of face-centered cubic  $\gamma$ -Al<sub>2</sub>O<sub>3</sub> (PDF#29-0063), indicating the high purity of the nanoparticles.

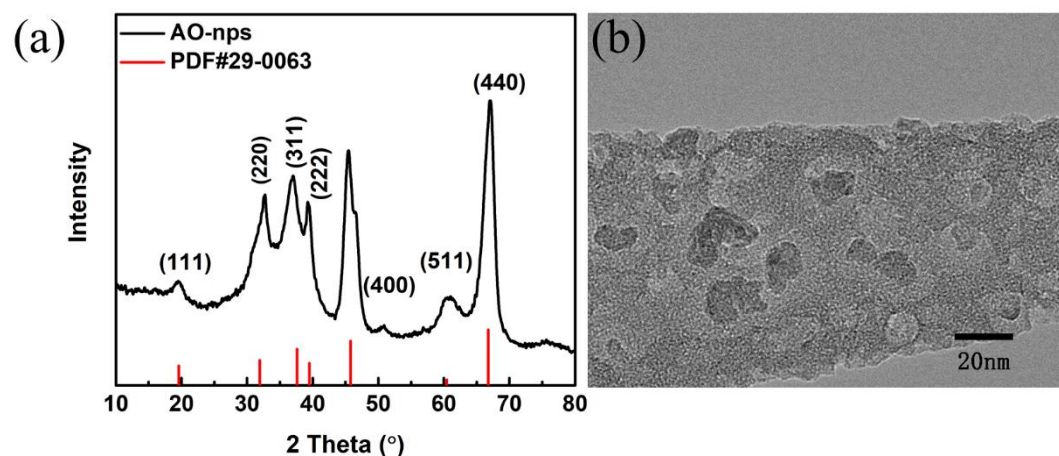

**Fig. S1.** (a) X-ray diffraction (XRD) patterns of the nanostructured Al<sub>2</sub>O<sub>3</sub> fillers. (b) TEM image of Al<sub>2</sub>O<sub>3</sub> particles.

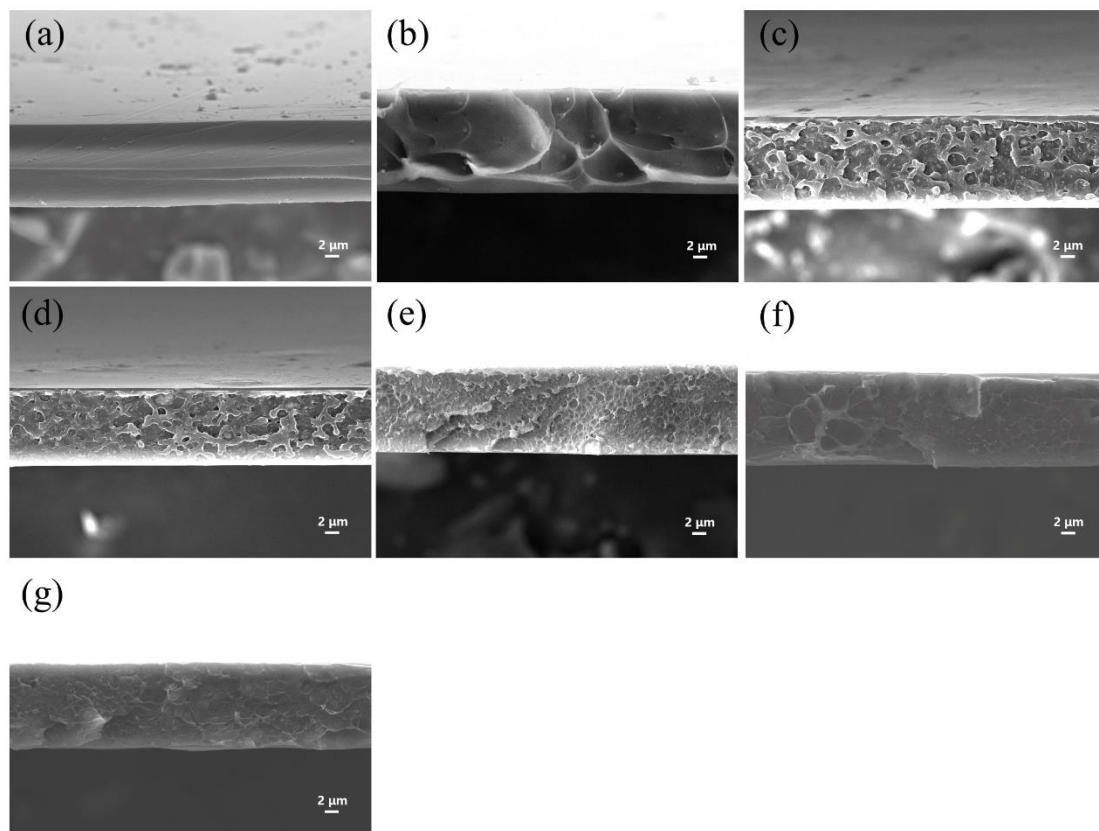

**Fig. S2.** Cross-sectional SEM images of (a) pure PEI film, (b) PEI nanocomposites with 0.5 vol% AO-nps, (c) PEI nanocomposites with 1 vol% AO-nps, (d) PEI nanocomposites with 2 vol% AO-nps, (e) PEI nanocomposites with 3 vol% AO-nps, (f) PEI nanocomposites with 5 vol% AO-nps, and (g) PEI nanocomposites with 7 vol% AO-nps.

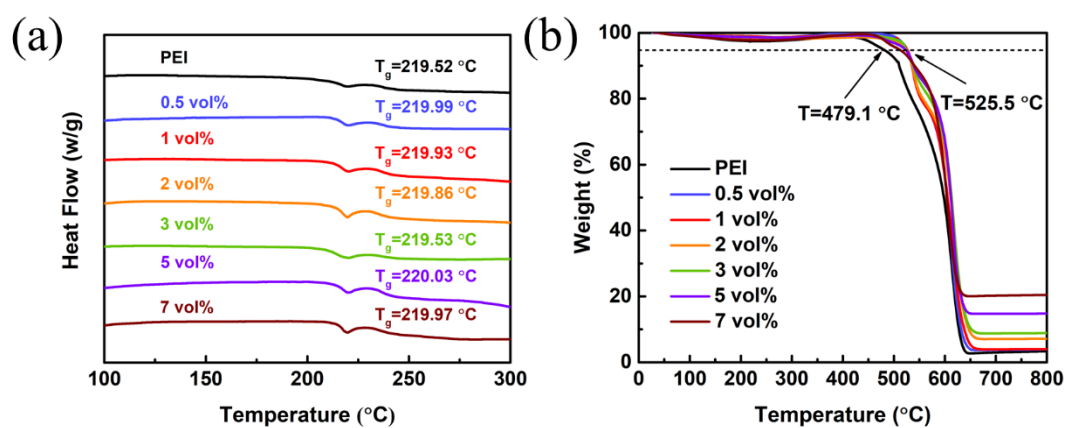

**Fig. S3.** (a) DSC and (b) TGA curves of pristine PEI and the PEI/AO-nps nanocomposite films.

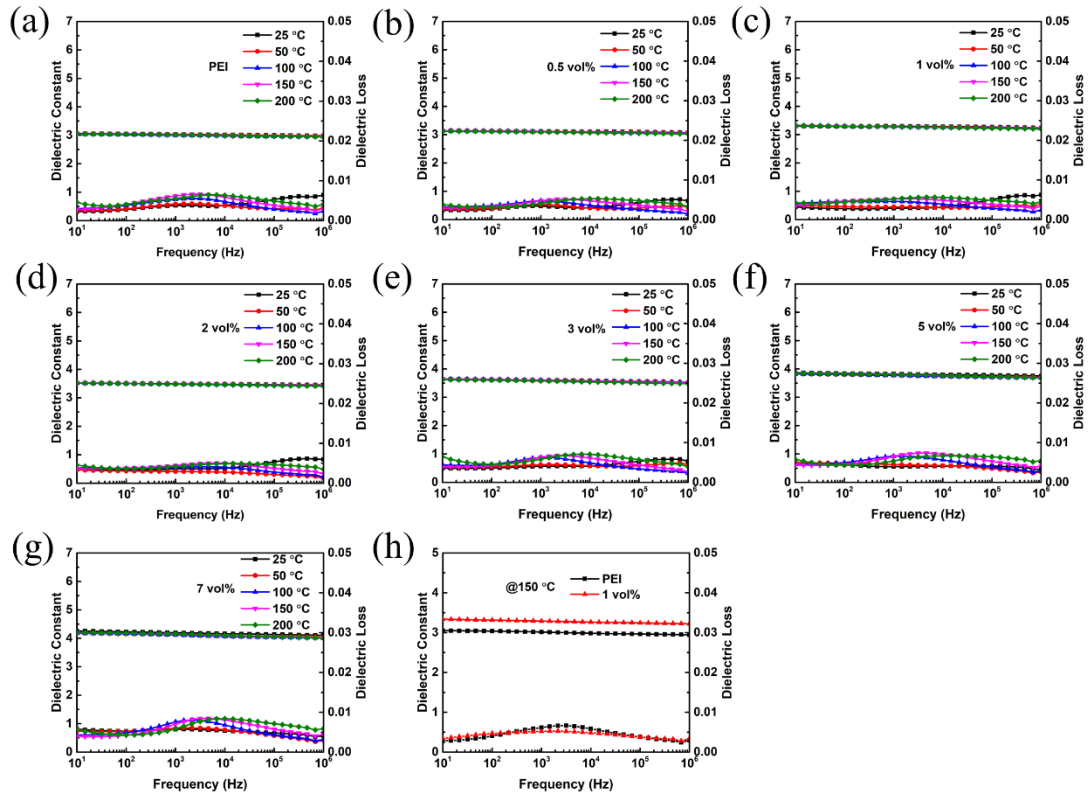

**Fig. S4.** Dielectric spectra of nanocomposites with varied frequency and temperature, (a) PEI, (b) 0.5vol%, (c) 1vol%, (d) 2 vol%, (e) 3 vol%, (f) 5 vol%, and (g) 7vol%. (h) Frequency-dependent dielectric properties of the PEI and PEI composite with 1vol% AO-nps at 150 °C.

**Table S1** Breakdown strength of PEI and nanocomposites with varied content measured at different temperature.

| 成分       | 25 °C  |         | 50 °C  |         | 100 °C |         | 150 °C |         |
|----------|--------|---------|--------|---------|--------|---------|--------|---------|
|          | $E_b$  | $\beta$ | $E_b$  | $\beta$ | $E_b$  | $\beta$ | $E_b$  | $\beta$ |
|          | (MV/m) |         | (MV/m) |         | (MV/m) |         | (MV/m) |         |
| PEI      | 558.1  | 16.9    | 558.1  | 14.5    | 500.3  | 13.0    | 421.8  | 6.5     |
| 0.5 vol% | 567.7  | 15.7    | 562.6  | 17.3    | 516.0  | 13.8    | 445.3  | 8.0     |
| 1 vol%   | 581.7  | 19.4    | 575.9  | 18.5    | 548.2  | 16.6    | 503.9  | 11.1    |
| 2 vol%   | 571.3  | 20.1    | 566.1  | 20.1    | 527.2  | 19.3    | 456.8  | 7.4     |
| 3 vol%   | 544.9  | 16.5    | 543.4  | 16.7    | 511.1  | 13.2    | 430.8  | 6.4     |
| 5 vol%   | 428.7  | 13.0    |        |         |        |         |        |         |
| 7 vol%   | 384.3  | 8.6     |        |         |        |         |        |         |

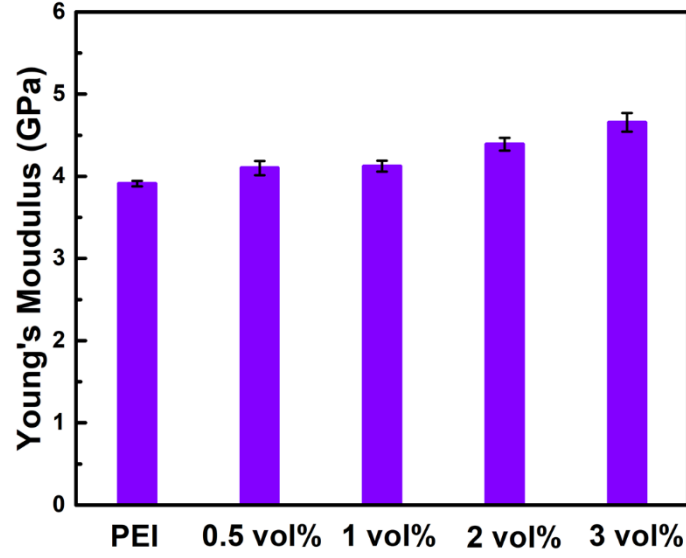

**Fig. S5.** Young's modulus of the nanocomposites with varied filler content measured at room temperature.

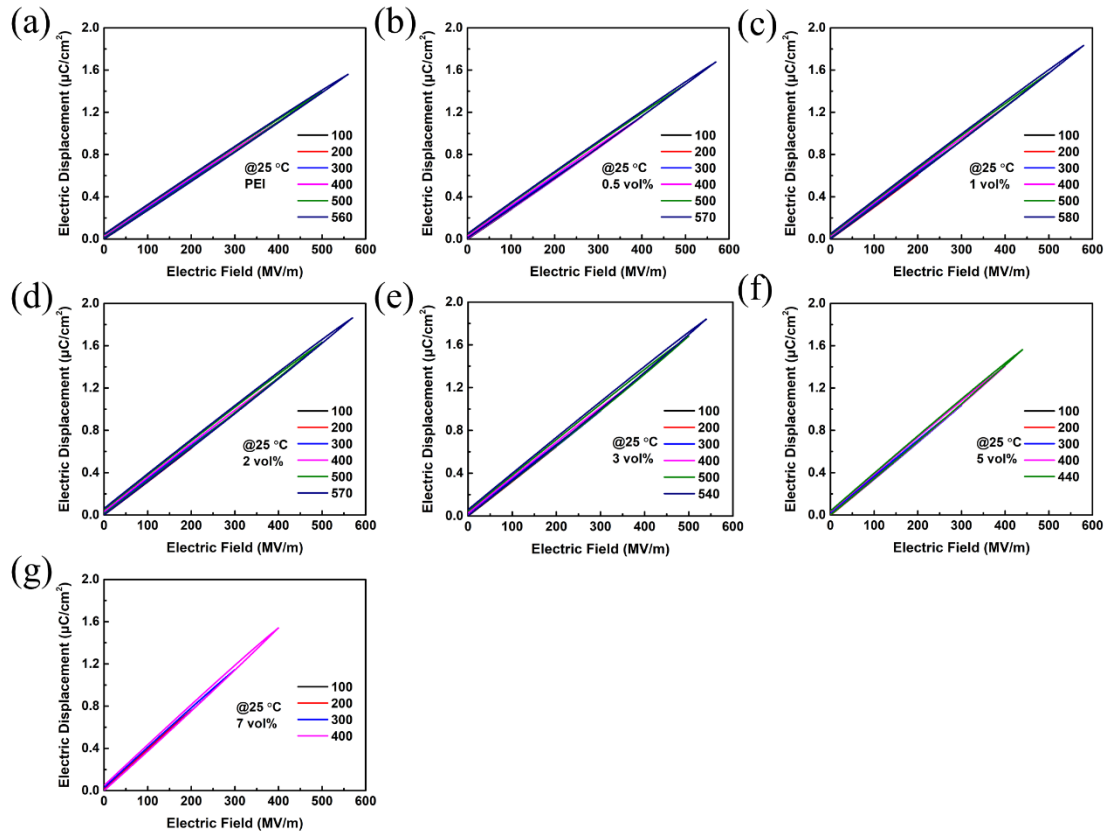

**Fig. S6.** Electric displacement-electric field (D-E) loops of nanocomposites with varied filler content measured at 25 °C, (a) PEI, (b) 0.5vol%, (c) 1vol%, (d) 2 vol%, (e) 3 vol%, (f) 5 vol%, and (g) 7vol%.

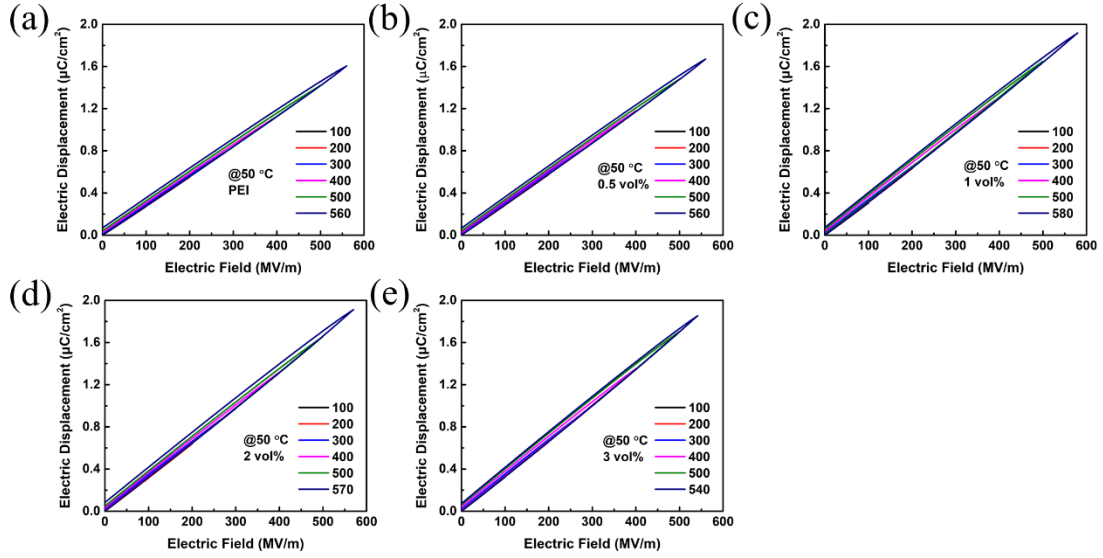

**Fig. S7.** Electric displacement-electric field (D-E) loops of nanocomposites with varied filler content measured at 50 °C, (a) PEI, (b) 0.5vol%, (c) 1vol%, (d) 2 vol%, and (e) 3 vol%.

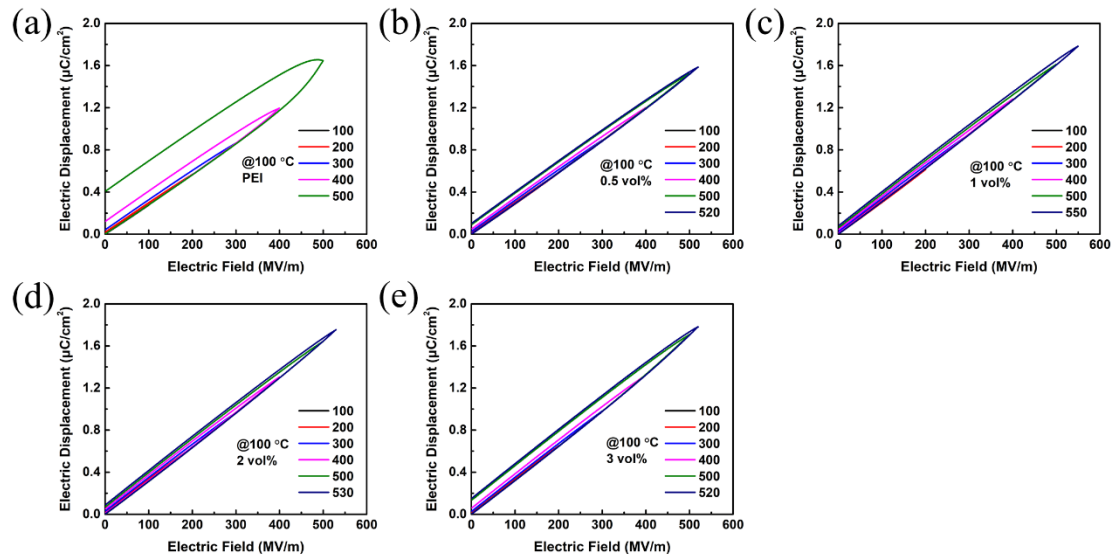

**Fig. S8.** Electric displacement-electric field (D-E) loops of nanocomposites with varied filler content measured at 100 °C, (a) PEI, (b) 0.5vol%, (c) 1vol%, (d) 2 vol%, and (e) 3 vol%.

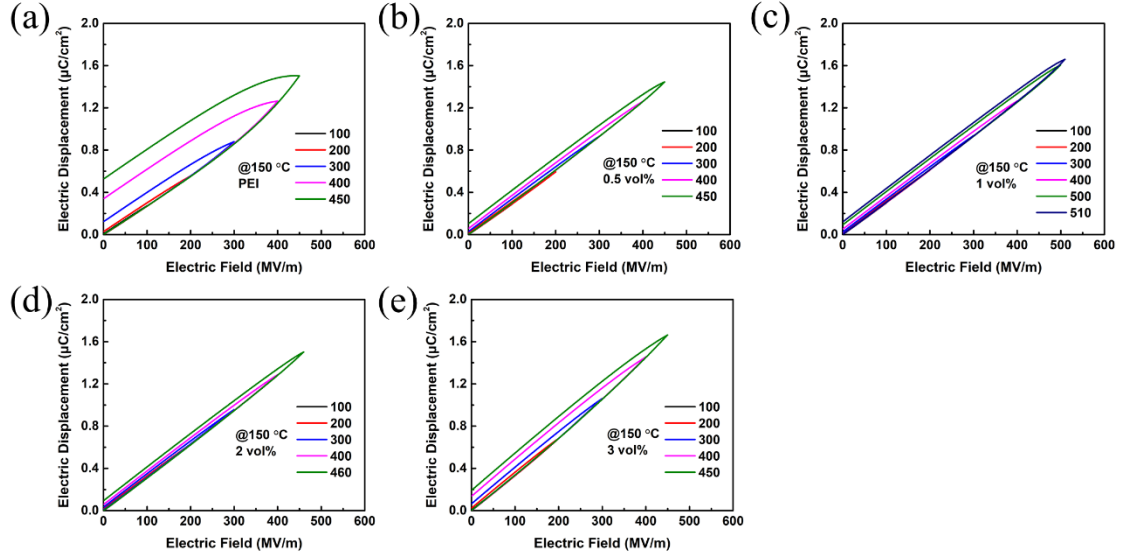

**Fig. S9.** Electric displacement-electric field (D-E) loops of nanocomposites with varied filler content measured at 150 °C, (a) PEI, (b) 0.5vol%, (c) 1vol%, (d) 2 vol%, and (e) 3 vol%.

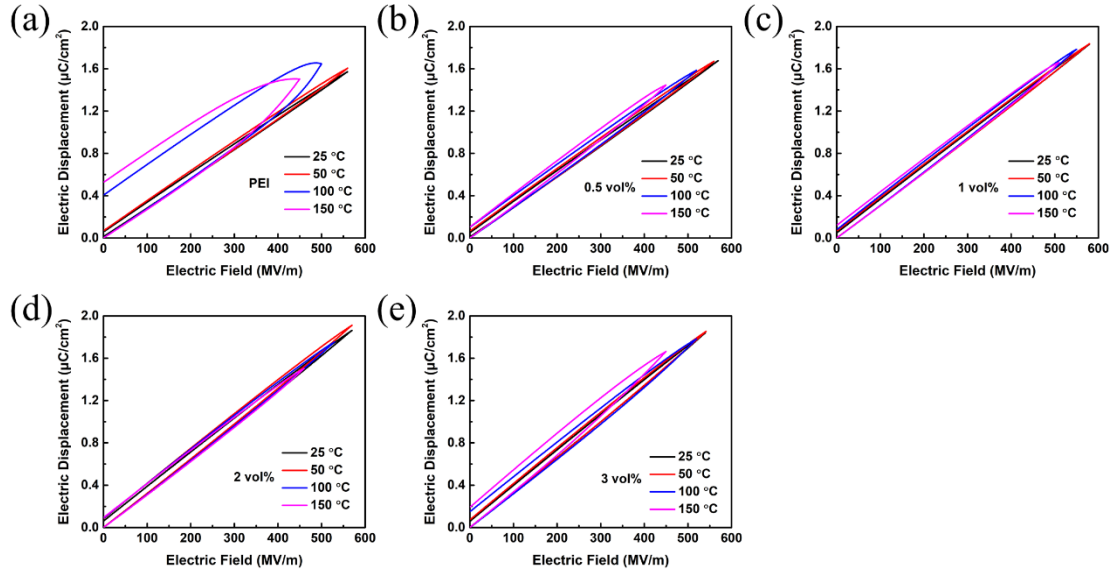

**Fig. S10.** Maximum electric displacement-electric field (D-E) loops of nanocomposites measured at different temperature, (a) PEI, (b) 0.5vol%, (c) 1vol%, (d) 2 vol%, and (e) 3 vol%.

**Fig. S11(a)** shows the TSDC spectroscopies of the nanocomposites, which are collected under a poling field ( $E_p$ ) of 15 MV/m for a poling time of 30 min at poling temperature ( $T_p$ ) of 150 °C. There is only a peak at 180-200 °C, which is supposed to

be ascribed to the depolarization of the injected charges from electrodes, i.e., Schottky or thermionic emission. As shown in **Fig. S11(b)** The  $E_p$ -dependent TSDC test was performed for PEI with 1 vol% AO-nps to verify the hypothesis about injection charges. In general, for Schottky emission, the current density ( $J$ ) scales as  $\ln J \propto E_p^{1/2}$ . At equilibrium state, the injected charges equal to the leakage charges ( $C$ ), which can be obtained from the TSDC spectrum as  $\ln C \propto E_p^{1/2}$ . **Fig. S11(c)** establishes the linear relationship between  $\ln C$  and  $E_p^{1/2}$ , which supports our prediction. The increase of maximum displacement and decrease of remnant displacement bring about considerable improvement in high-temperature electric energy storage.

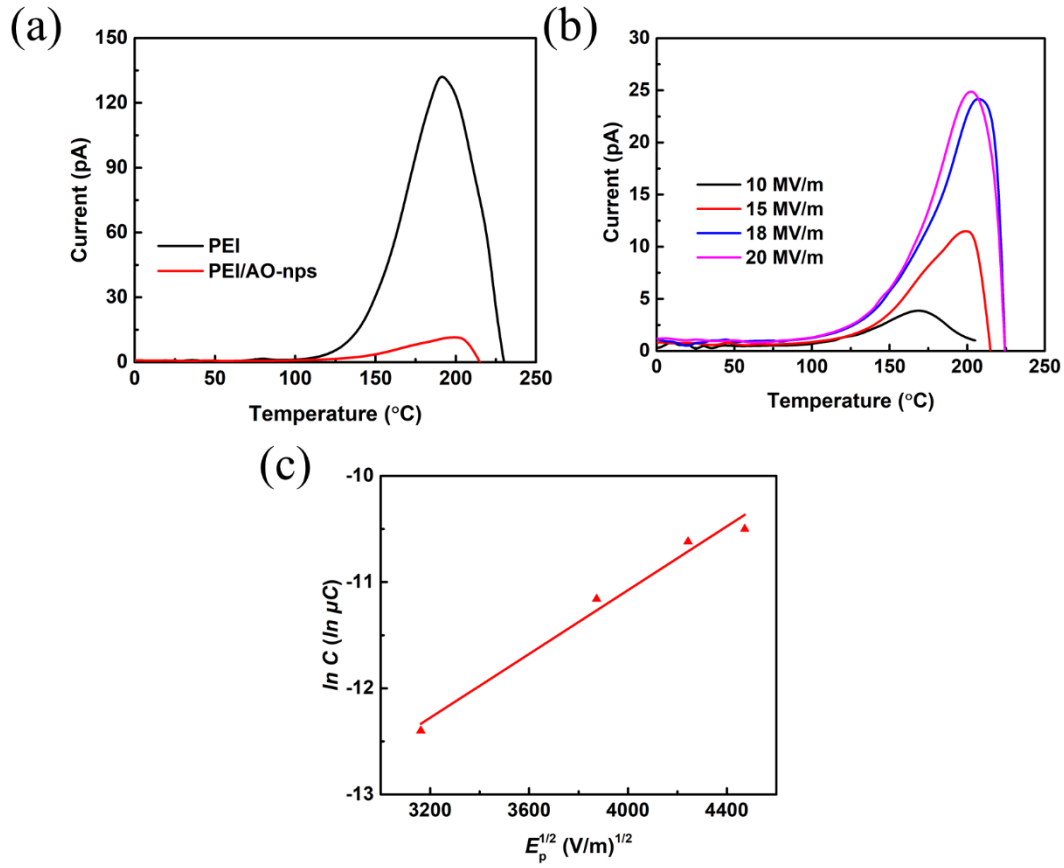

**Fig. S11.** (a) TSDC curves of PEI and PEI/AO-nps under poling electric field of 15 MV/m at 150 °C for 30 min. (b) TSDC spectra for PEI/AO-nps film under different poling electric field at 150 °C for 30 min. (c) The relationship between  $\ln C$  and  $E_p^{1/2}$ .

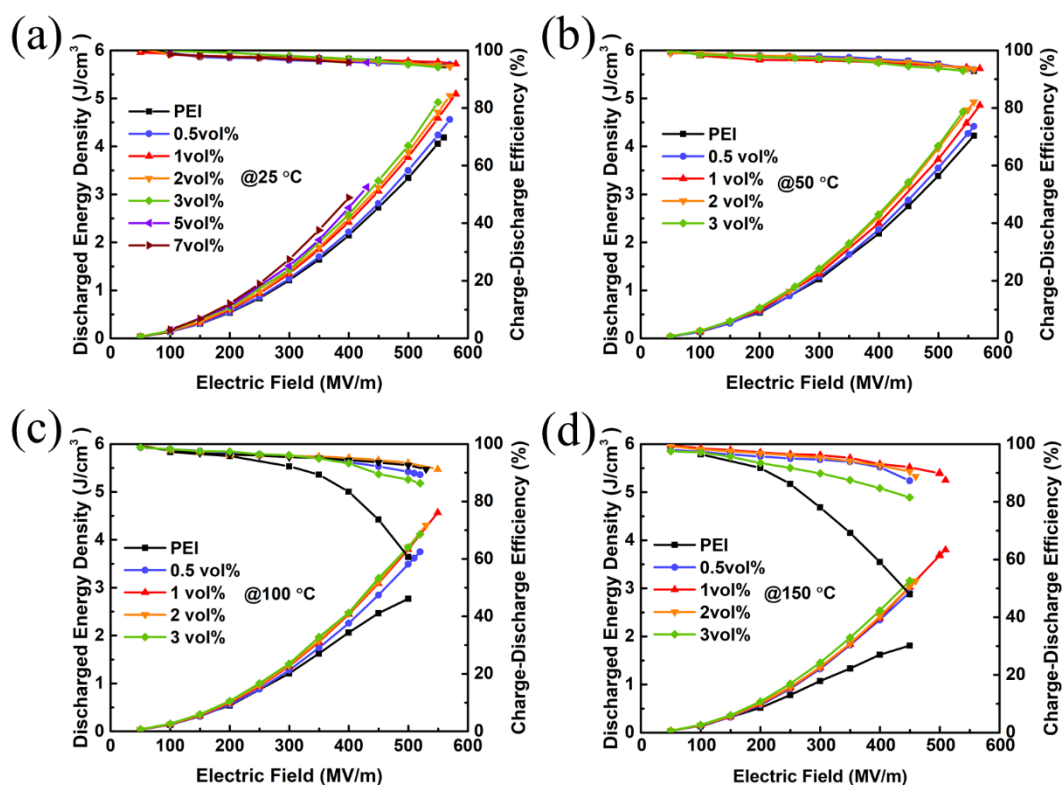

**Fig. S12.** Discharged energy density and charge-discharge efficiency of PEI/AO-nps nanocomposite films with varied filler contents measured at (a) 25 °C, (b) 50 °C, (c) 100 °C, and (d) 150 °C.

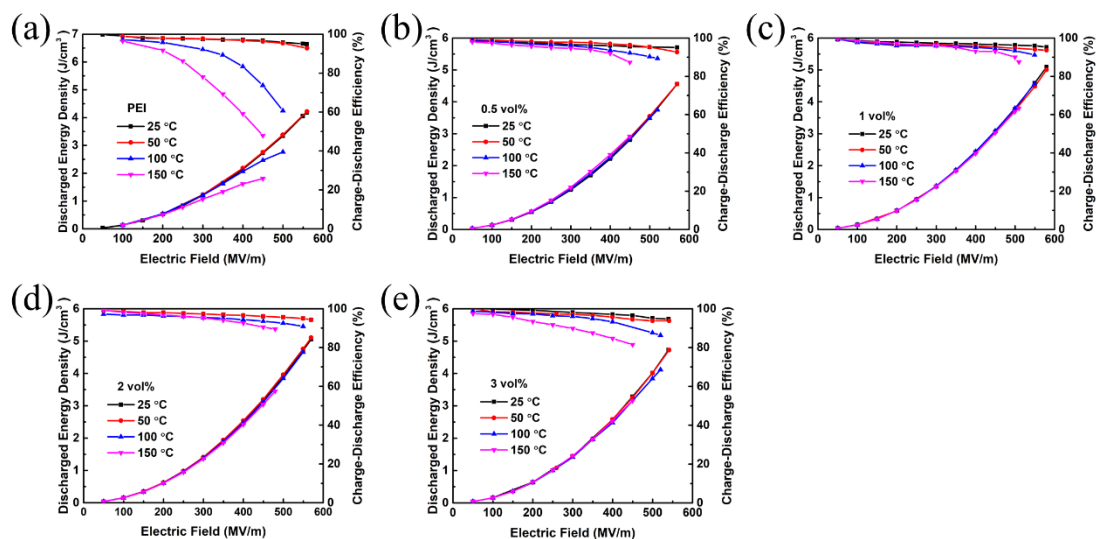

**Fig. S13.** Discharged energy density and charge-discharge efficiency of PEI/AO-nps nanocomposite films measured at different temperature, (a) PEI, (b) 0.5 vol%, (c) 1 vol%, (d) 2 vol%, and (e) 3 vol%.
